# Supplementary material for: Research and experimental verification on the mechanisms of cellular senescence in triple-negative breast cancer
Source: PeerJ journal article supplement (doi:10.7717/peerj.16935), 2024-02-29

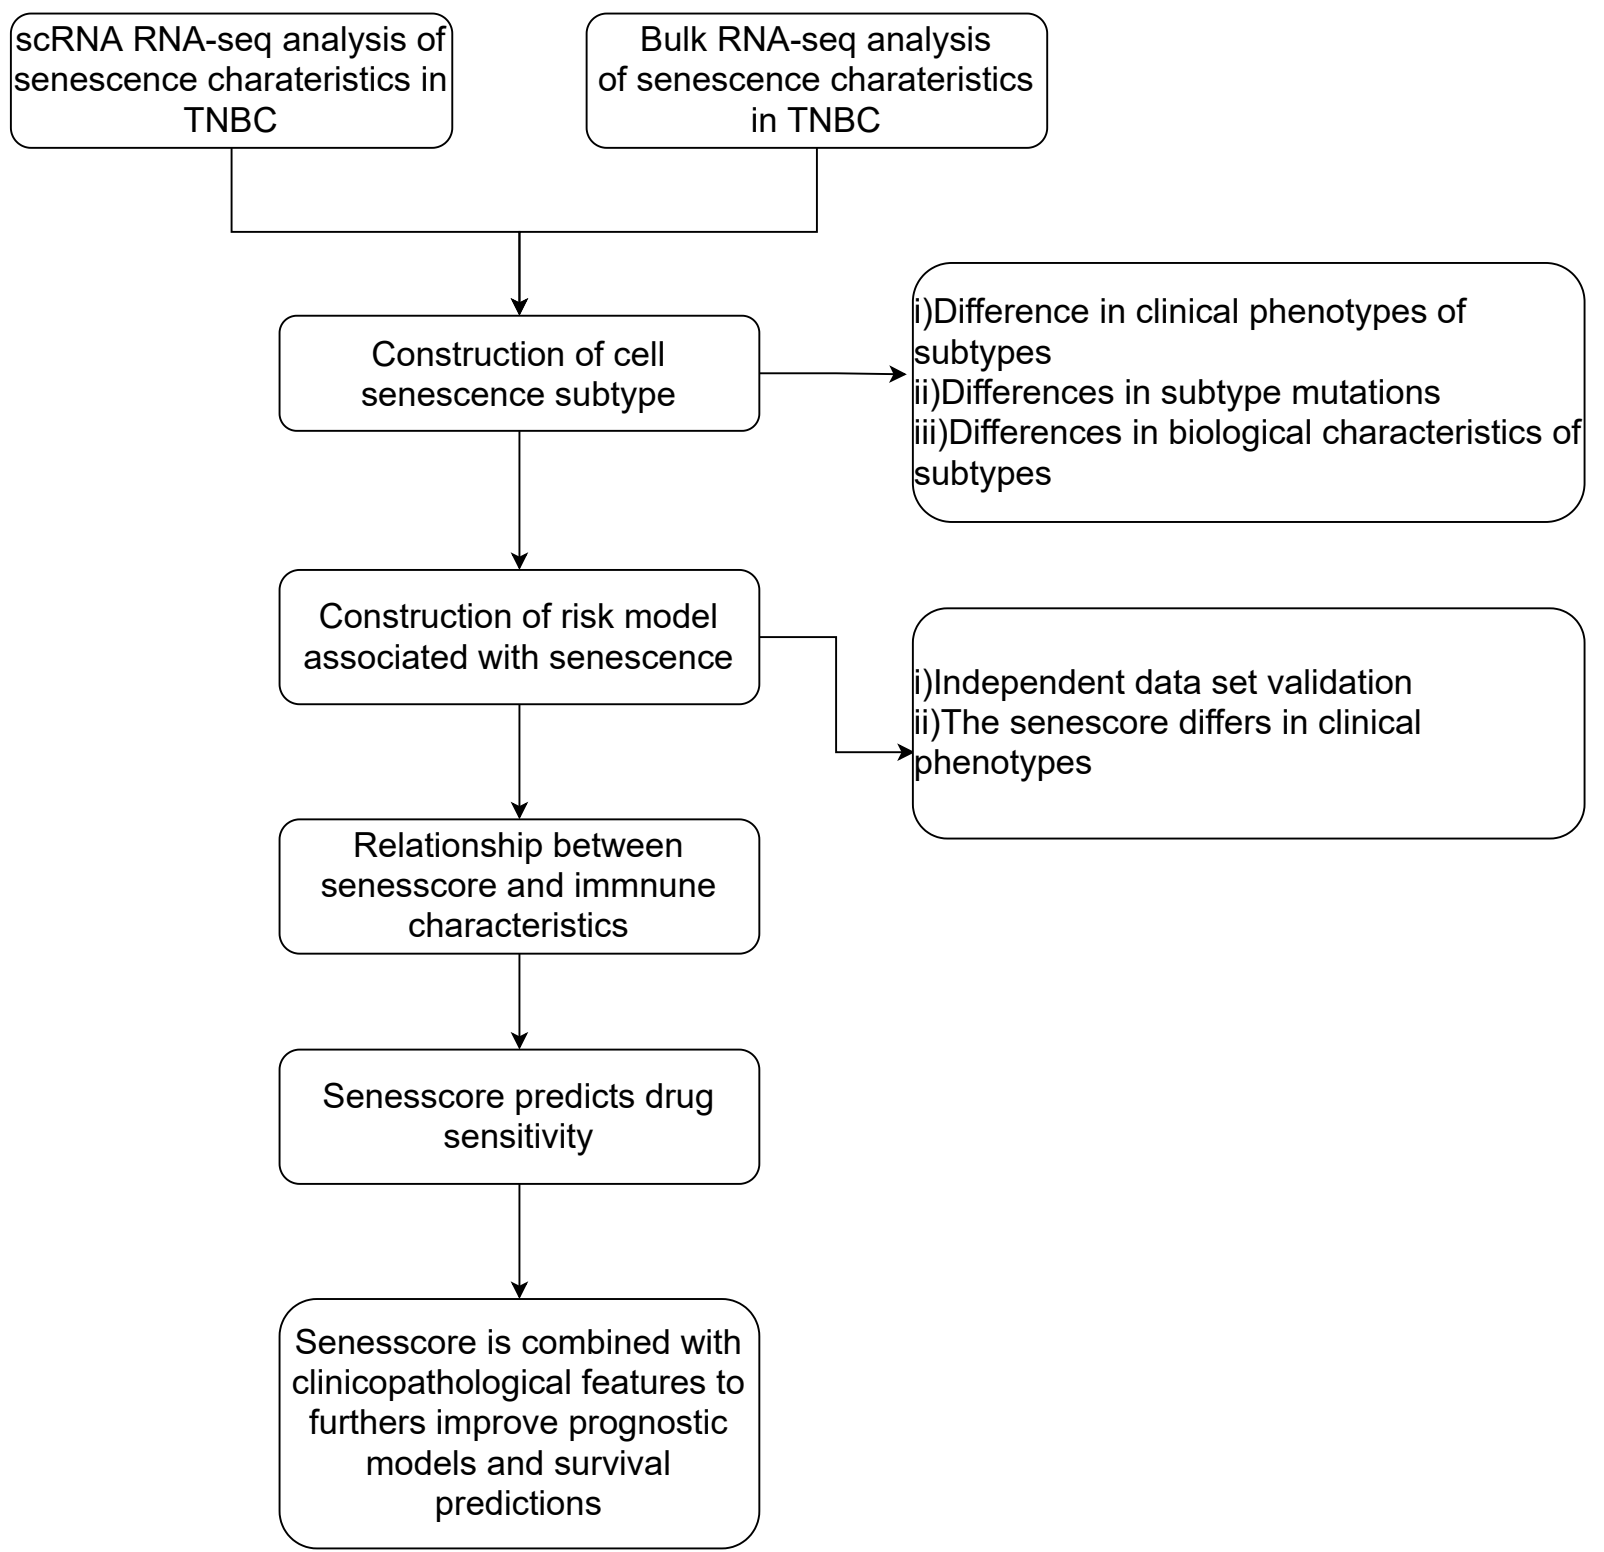

Supplement: FigS1.pdf [file FigS1.pdf]
