# Supplementary material for: Research and experimental verification on the mechanisms of cellular senescence in triple-negative breast cancer
Source: PeerJ journal article supplement (doi:10.7717/peerj.16935), 2024-02-29
Supplement: FigS2.pdf [file FigS2.pdf]

KEGG\_P53\_SIGNALING\_PATHWAY

REACTOME\_CELLULAR\_SENESCENCE

REACTOME\_DNA\_DAMAGE\_TELOMERE\_STRESS\_INDUCED\_SENESCENCE

clust1

clust2

clust3

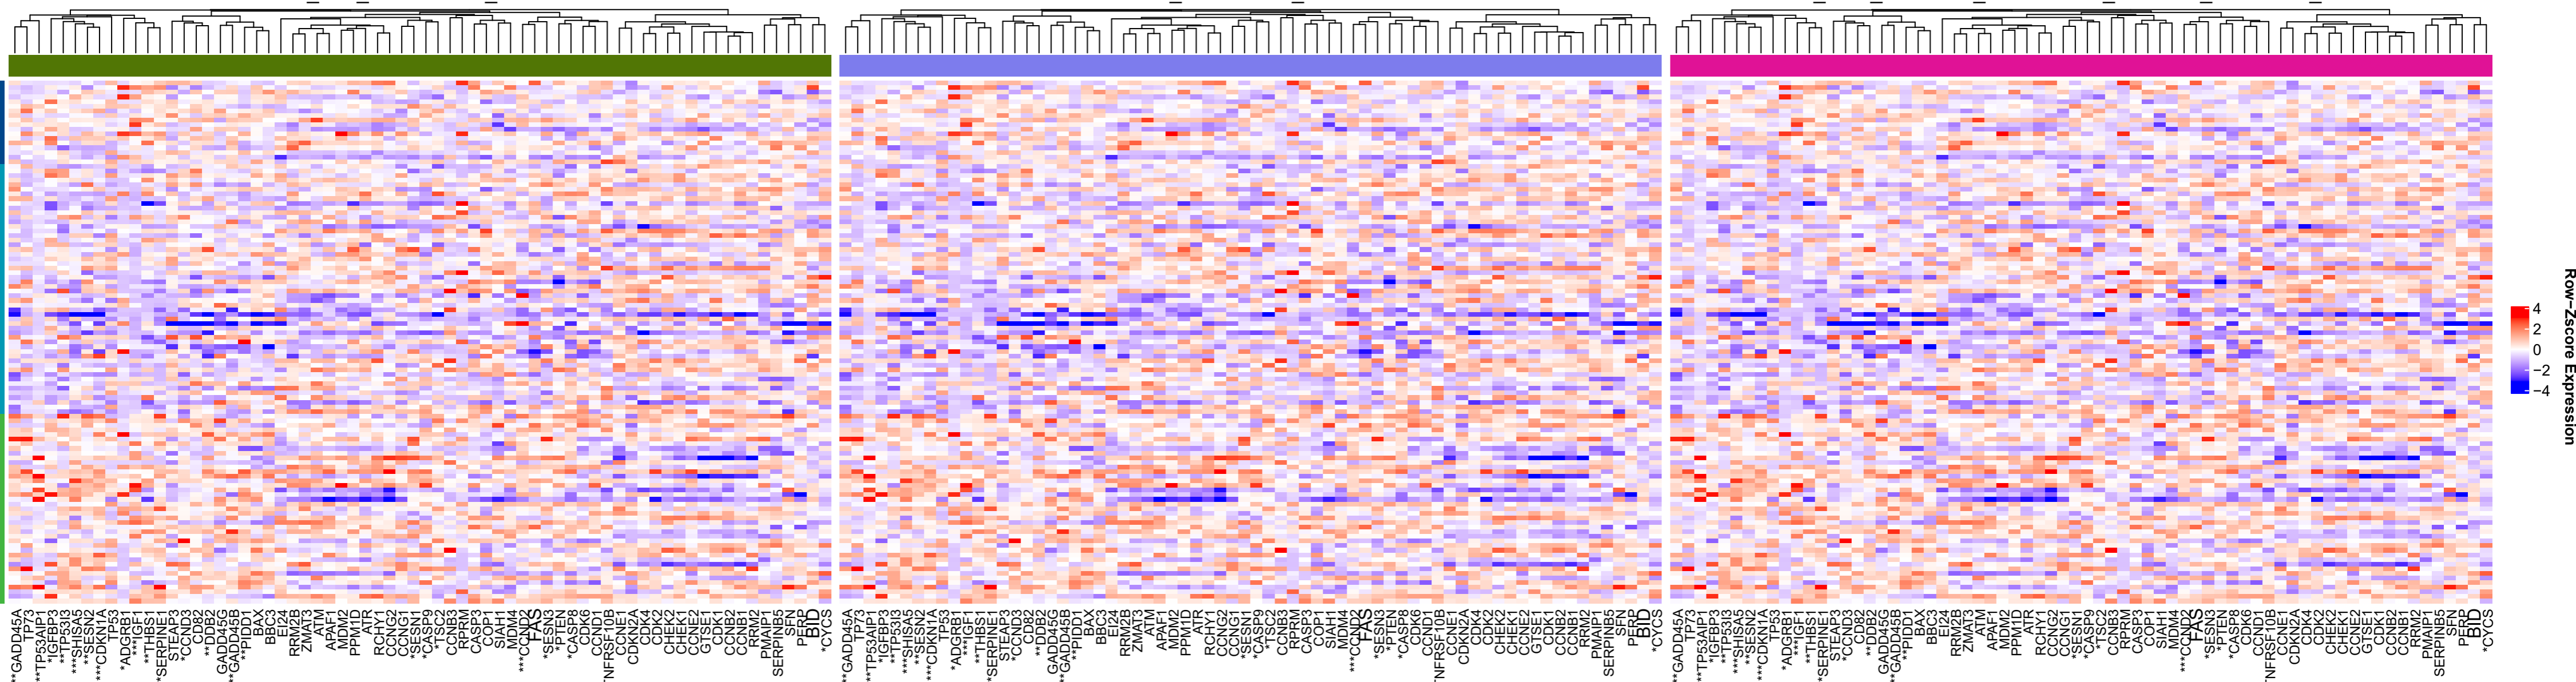

Row-Zscore Expression

\*\*GADD45A  
 TP73  
 \*\*\*TP53AIP1  
 \*IGFBP3  
 \*\*TP53J3  
 \*\*\*SHISA5  
 \*\*SESN2  
 \*\*\*CDKN1A  
 TP53  
 \*ADGRB1  
 \*\*\*IGF1  
 \*\*THBS1  
 \*\*\*SERPINE1  
 STEAP3  
 \*CCND3  
 \*\*DDB2  
 GADD45G  
 \*\*GADD45B  
 \*\*\*PIDD1  
 BAX  
 BBC3  
 E124  
 RRM2B  
 ZMAT3  
 ATM  
 APAF1  
 MDM2  
 PPM1D  
 ATR  
 RCHY1  
 CCNG2  
 CCNG1  
 \*SESN1  
 \*CASP9  
 \*TSC2  
 CCNB3  
 RPRM  
 CASP3  
 COP1  
 SIAH1  
 MDM4  
 \*\*\*CCND2  
 FAS  
 \*SESN3  
 \*PTEN  
 \*CASP8  
 CDK6  
 CCND1  
 TNFRSF10B  
 CCNE1  
 CDKN2A  
 CDK4  
 CDK2  
 CHEK2  
 CHEK1  
 CCNE2  
 GTSE1  
 CDK1  
 CCNB2  
 CCNB1  
 RRM2  
 PMAIP1  
 SERPINB5  
 SFN  
 PERP  
 BID  
 \*CYCS
