# Supplementary material for: Research and experimental verification on the mechanisms of cellular senescence in triple-negative breast cancer
Source: PeerJ journal article supplement (doi:10.7717/peerj.16935), 2024-02-29
Supplement: RawData.zip [file RawData.zip]

# MMP28

## Amplification Plot

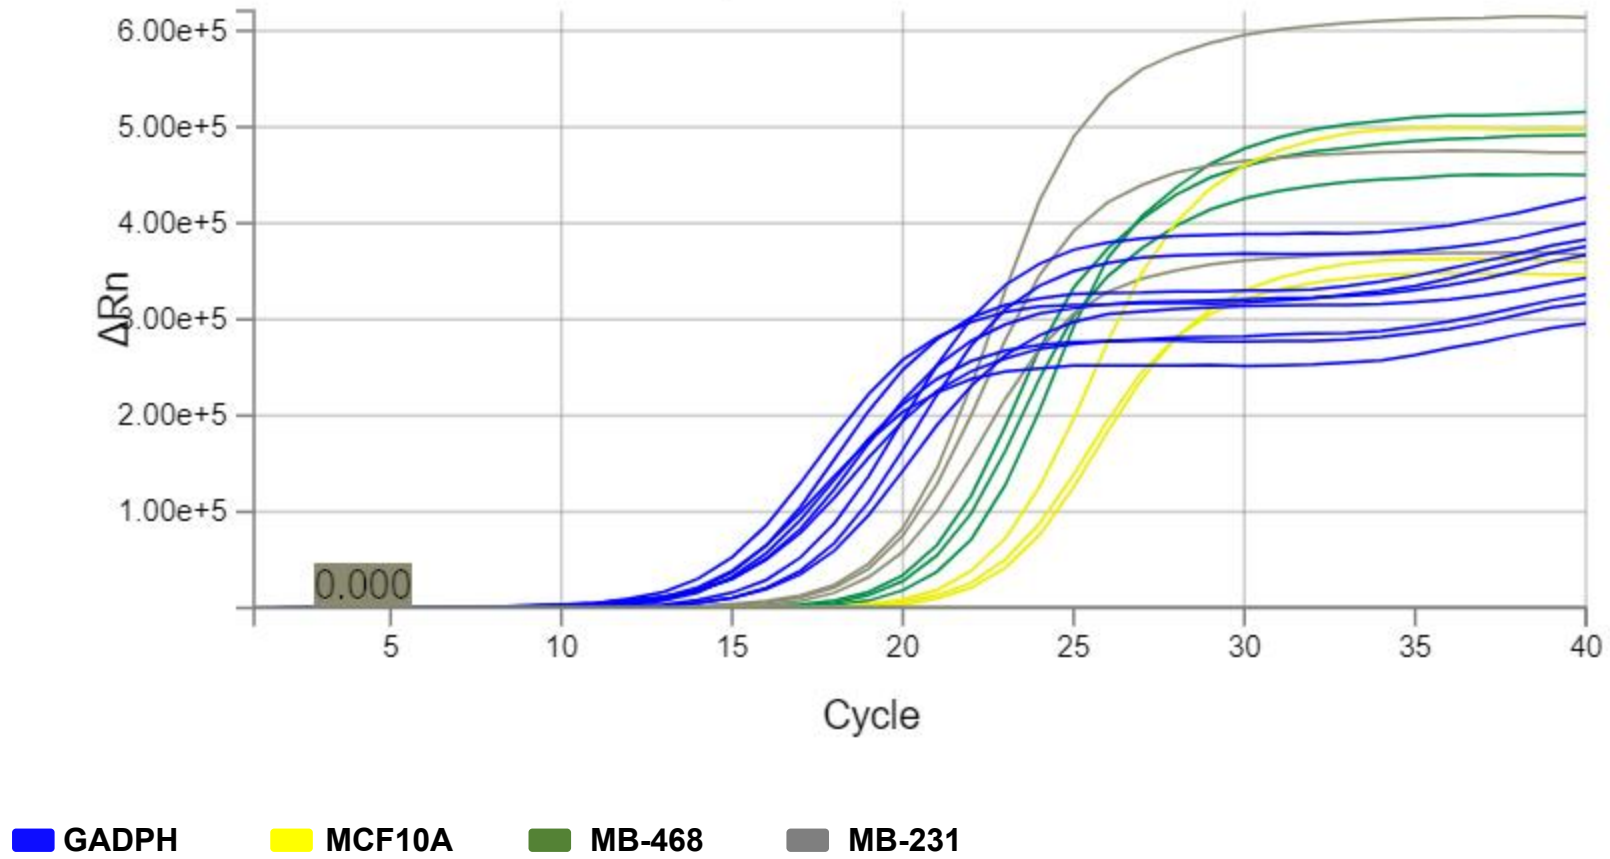

# MMP28

## Melt Curve Plot (Derivative)

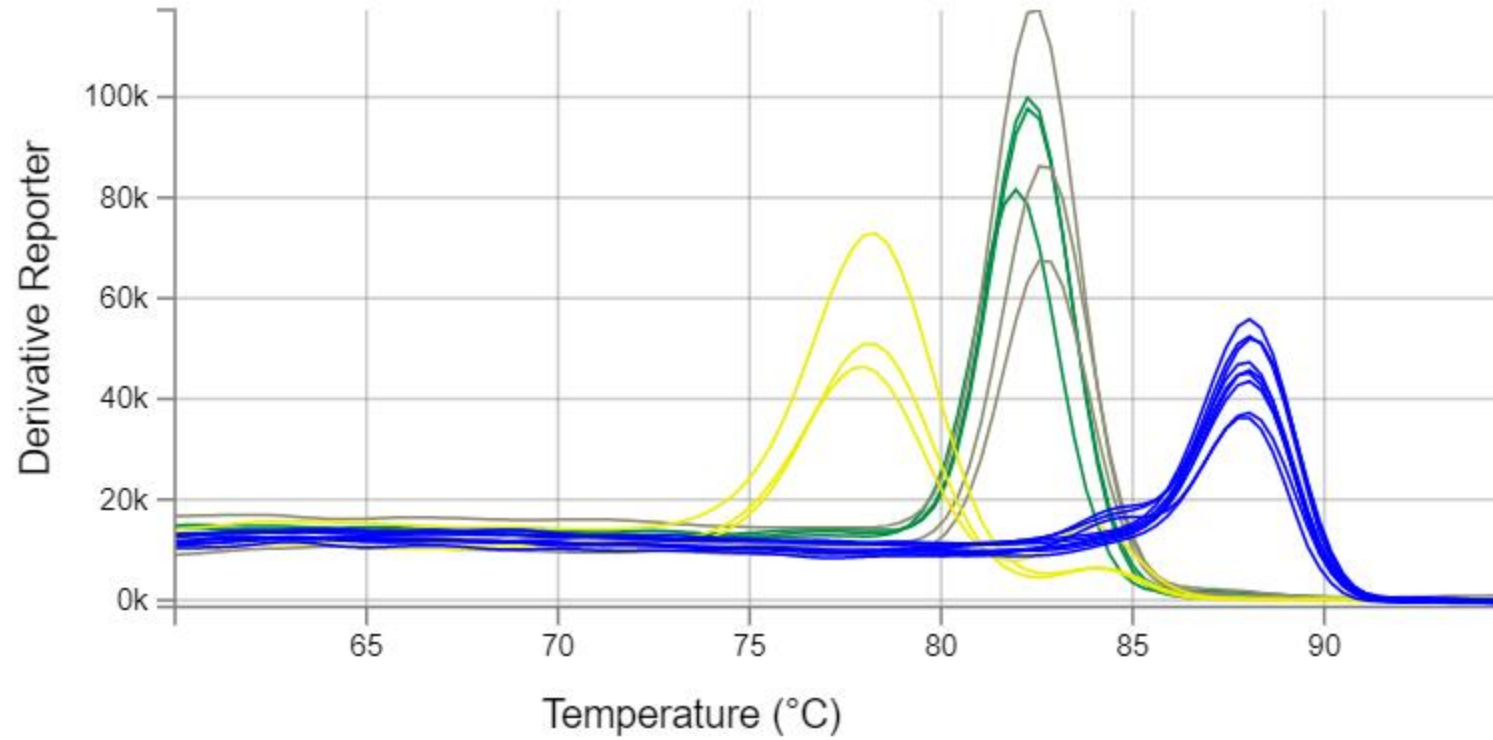

■ GADPH    ■ MCF10A    ■ MB-468    ■ MB-231

CT83

### Amplification Plot

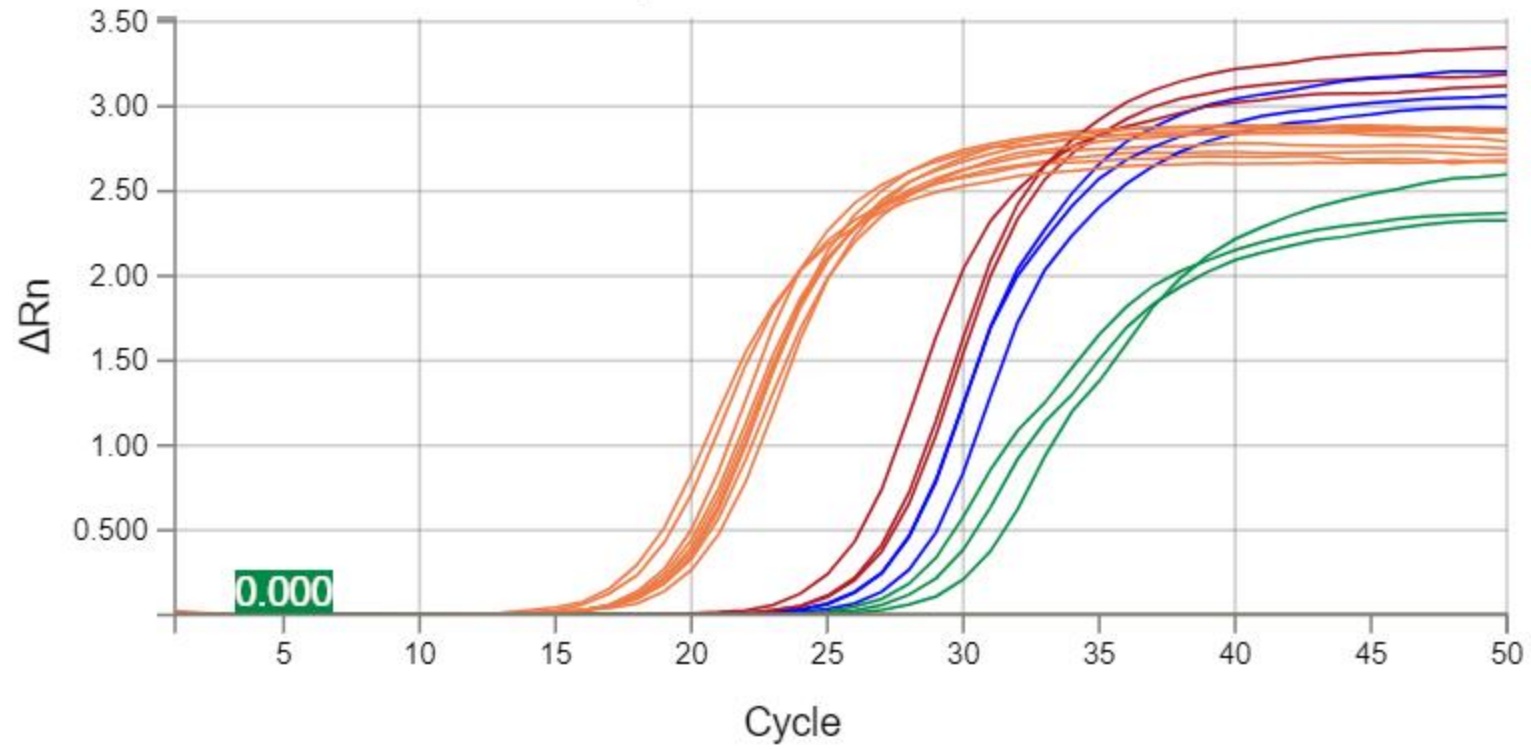

■ GADPH    ■ MCF10A    ■ MB-468    ■ MB-231

CT83

**Melt Curve Plot (Derivative)**

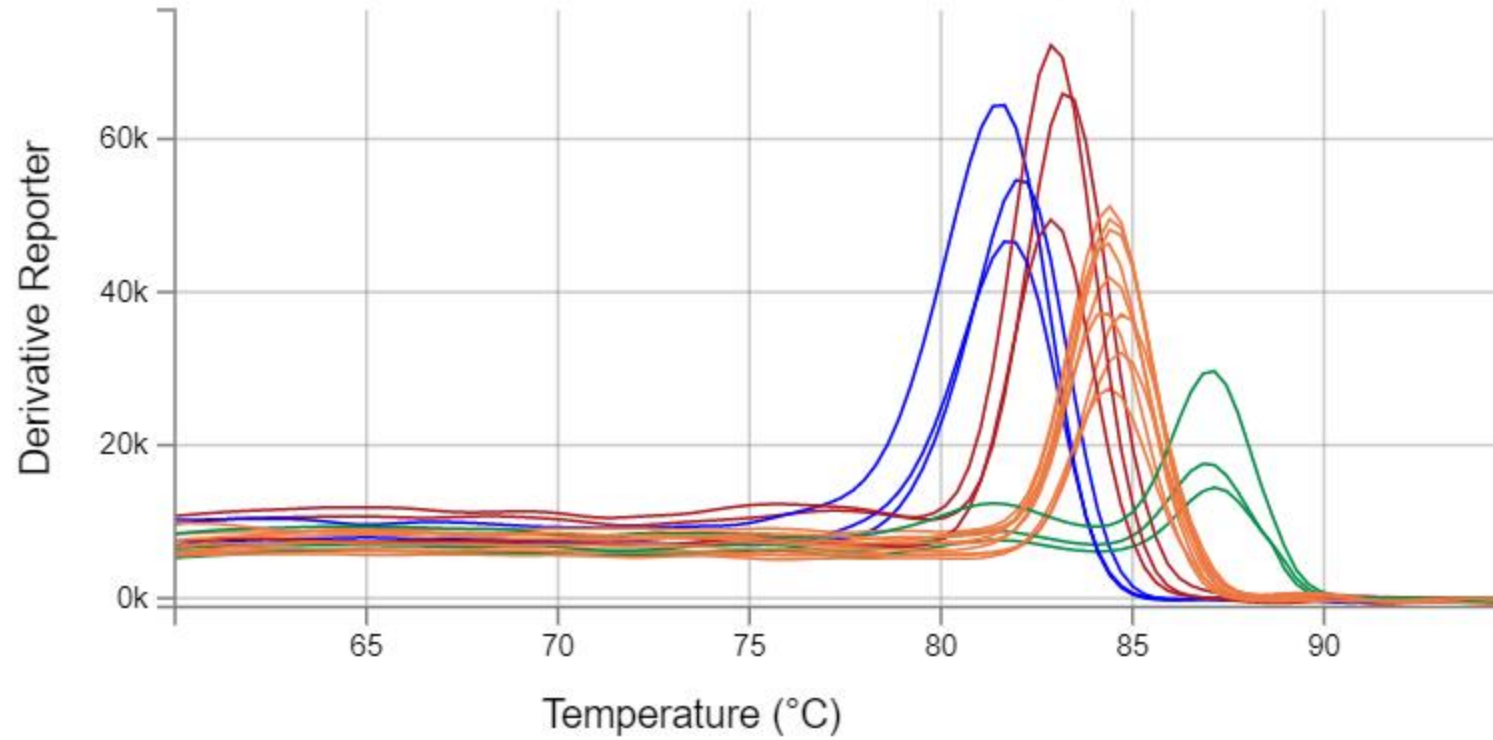

■ GADPH ■ MCF10A ■ MB-468 ■ MB-231

# ACP5

## Amplification Plot

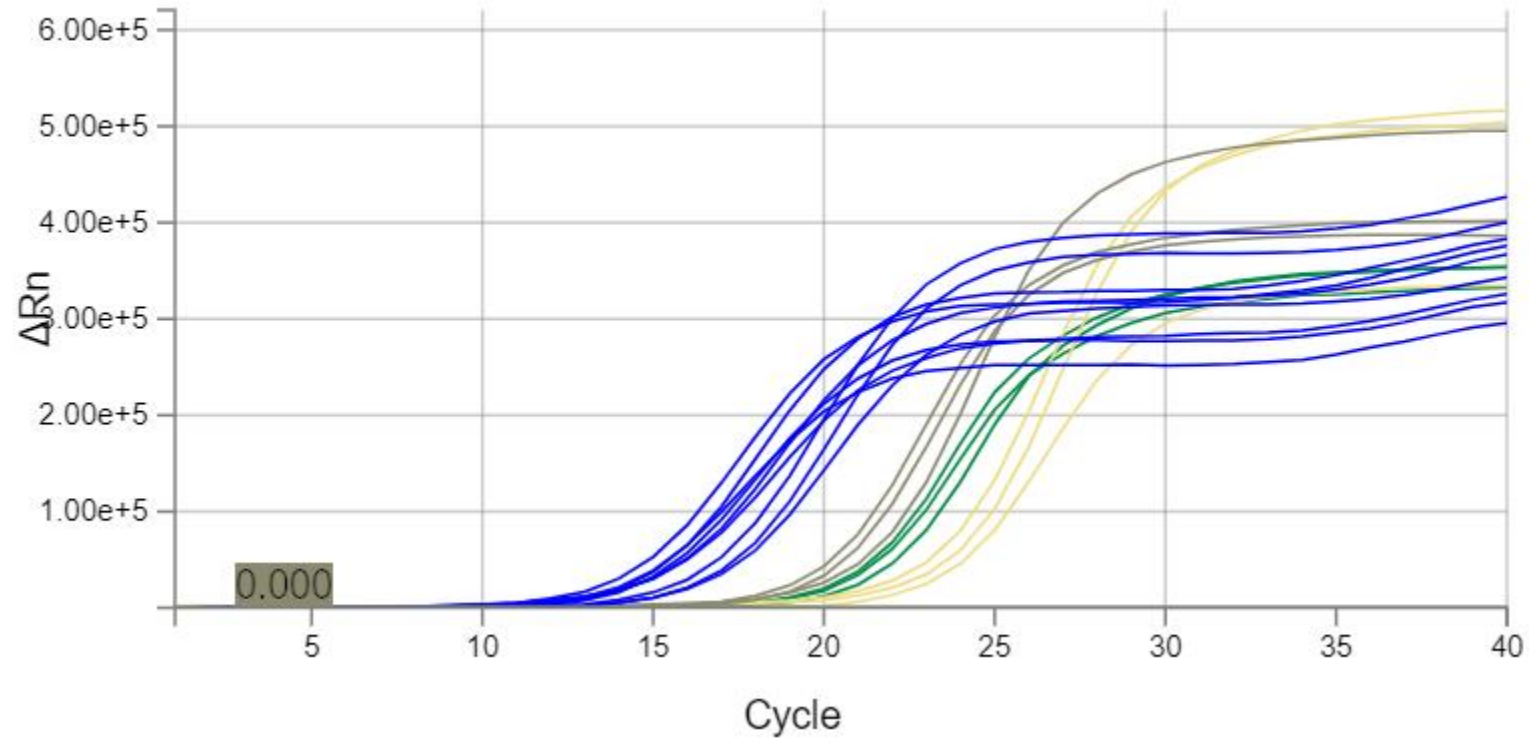

■ GADPH    ■ MCF10A    ■ MB-468    ■ MB-231

# ACP5

## Melt Curve Plot (Derivative)

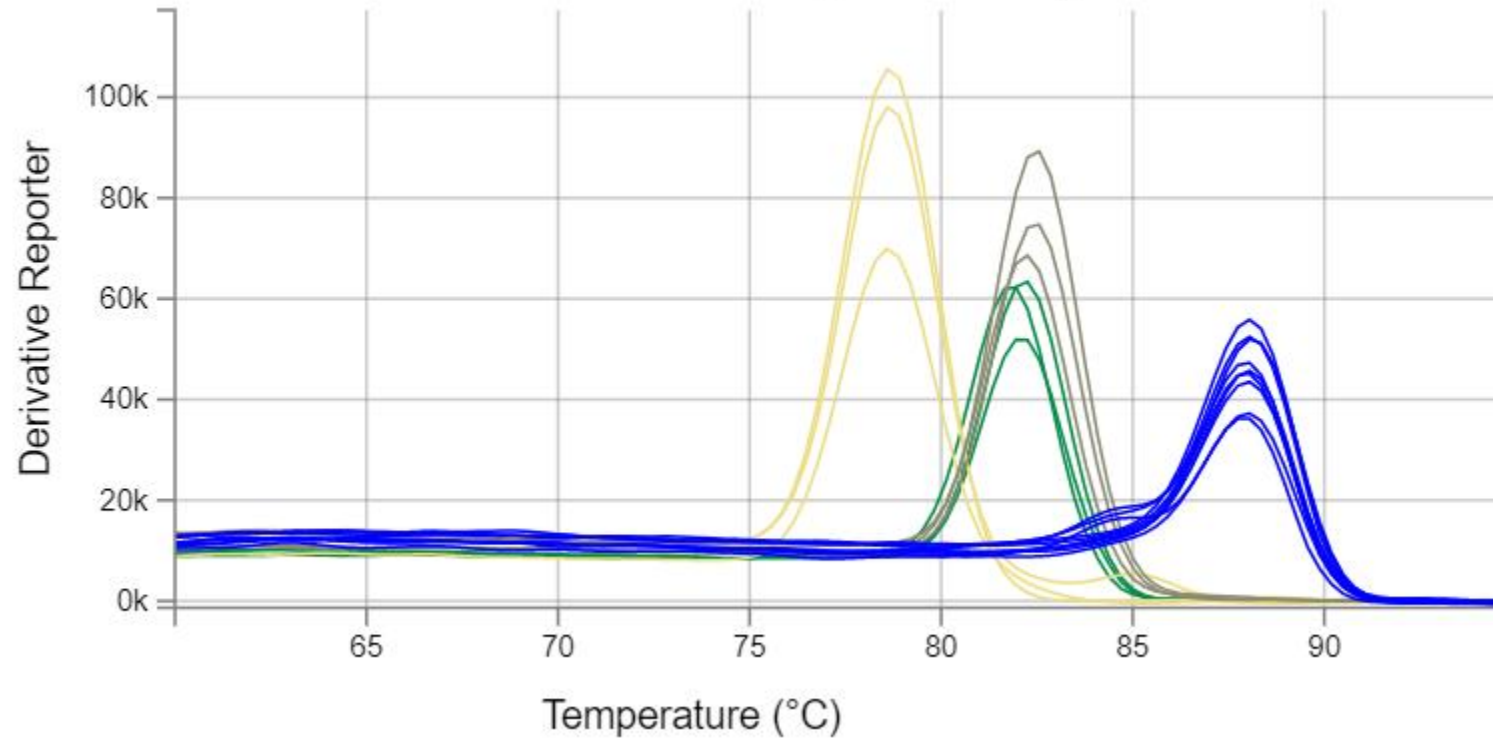

■ GADPH

■ MCF10A

■ MB-468

■ MB-231

# KRT6A

## Amplification Plot

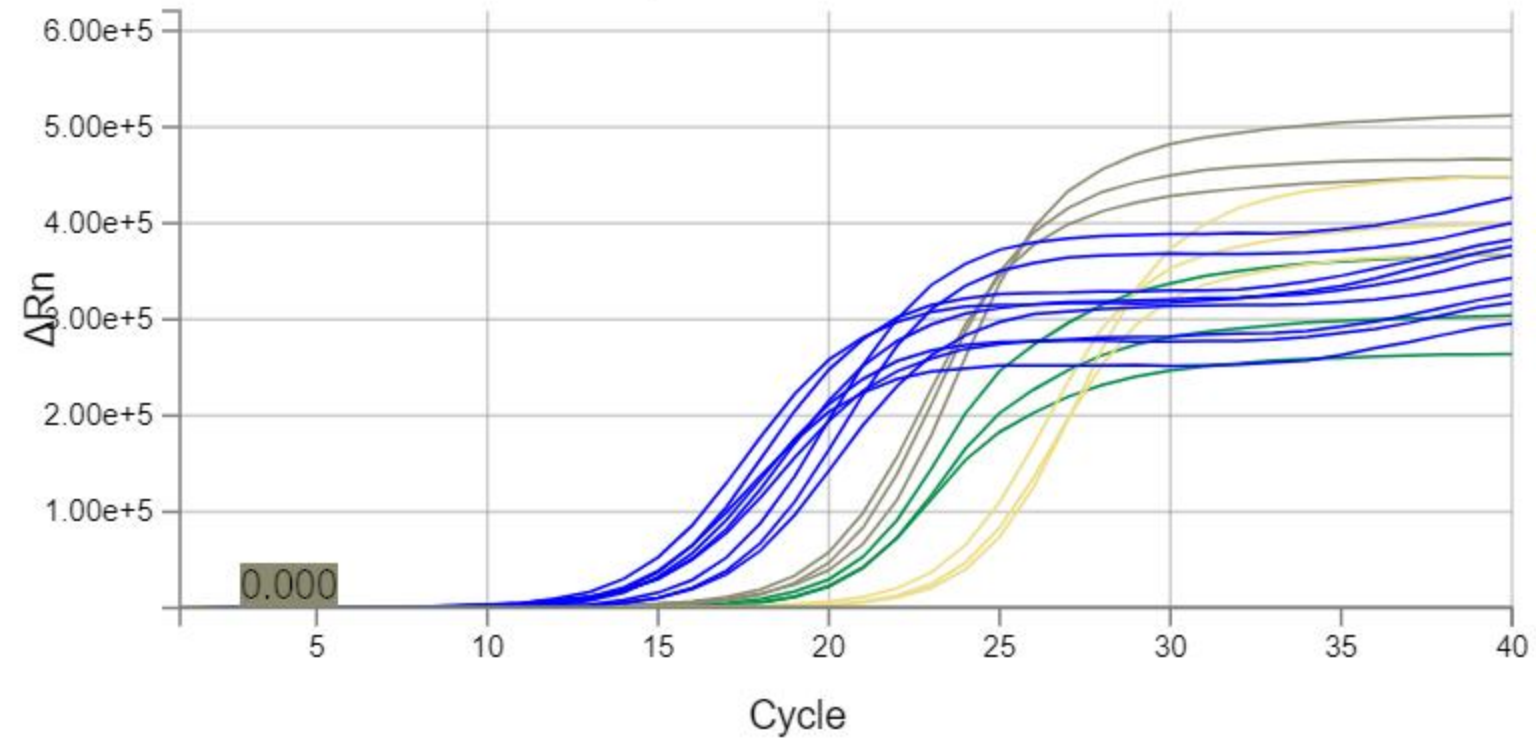

■ GADPH    ■ MCF10A    ■ MB-468    ■ MB-231

# KRT6A

## Melt Curve Plot (Derivative)

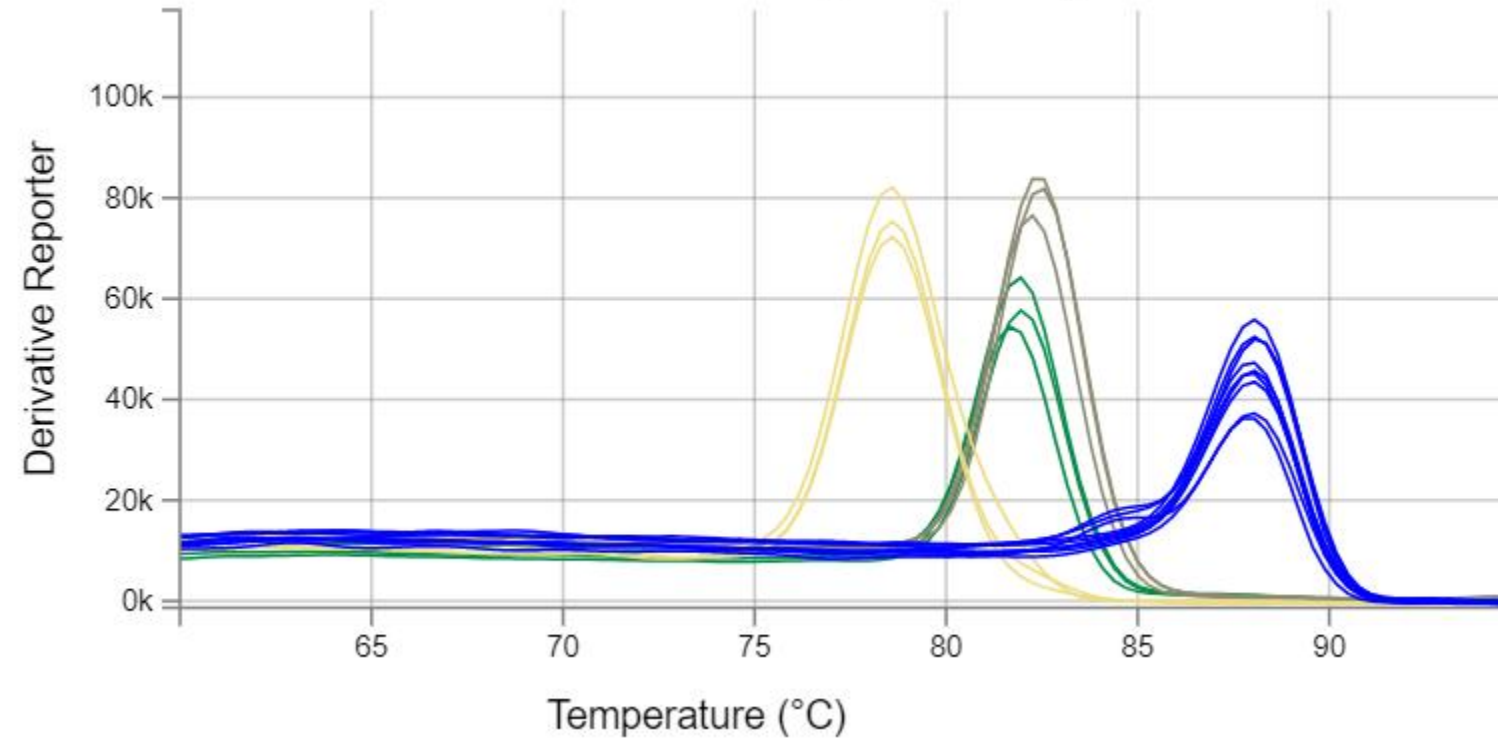

■ GADPH    ■ MCF10A    ■ MB-468    ■ MB-231
