# Supplementary material for: Research and experimental verification on the mechanisms of cellular senescence in triple-negative breast cancer
Source: PeerJ. 2024 Feb 29;12:e16935. doi: 10.7717/peerj.16935 (PMC10909353; doi:10.7717/peerj.16935)
Supplement: Supplemental Information 8 [file peerj-12-16935-s008.xls]

## Sheet: Sheet1
ITEM TO CHECK	IMPORTANCE	CHECKLIST
EXPERIMENTAL DESIGN
Definition of experimental and control groups	E	page14 line283-290	must
Number within each group	E	page41 line974-975
Assay carried out by core lab or investigator's lab?	D	page15 line298	should
Acknowledgement of authors' contributions	D	page31 line669-674
SAMPLE
Description	E	page13 line267-268
Volume/mass of sample processed	D	page13 line270-272
Microdissection or macrodissection	E	page15 line297-298
Processing procedure	E	page13-15 line266-298
If frozen - how and how quickly?	E	page14 line283-290
If fixed - with what, how quickly?	E	page14-15 line296-297
Sample storage conditions and duration (especially for FFPE samples)	E	page14 line287-288
NUCLEIC ACID EXTRACTION
Procedure and/or instrumentation	E	page13 line266-280
Name of kit and details of any modifications	E	page13 line267-269
Source of additional reagents used	D	No applicable
Details of DNase or RNAse treatment	E	page13 line267-270
Contamination assessment (DNA or RNA)	E	page13 line270-274
Nucleic acid quantification	E	page13 line267-278
Instrument and method	E	page13 line267-278
Purity (A260/A280)	D	page12 line268-269
Yield	D	page13 line277-278
RNA integrity method/instrument	E	page13 line274-278
RIN/RQI or Cq of 3' and 5' transcripts	E	page13-14 line280-281
Electrophoresis traces	D	No applicable
Inhibition testing (Cq dilutions, spike or other)	E	page14-15 line291-298
REVERSE TRANSCRIPTION
Complete reaction conditions	E	page13 line272-277
Amount of RNA and reaction volume	E	page13 line272-277
Priming oligonucleotide (if using GSP) and concentration	E	page13 line272-277
Reverse transcriptase and concentration	E	page13 line272-277
Temperature and time	E	page13 line272-277
Manufacturer of reagents and catalogue numbers	D	page13 line272-277
Cqs with and without RT	D*	page13 line272-277
Storage conditions of cDNA	D	page13 line272-277
qPCR TARGET INFORMATION
If multiplex, efficiency and LOD of each assay.	E	No multiplex
Sequence accession number	E	No applicable
Location of amplicon	D	No applicable
Amplicon length	E	No applicable
In silico specificity screen (BLAST, etc)	E	No applicable
Pseudogenes, retropseudogenes or other homologs?	D	No applicable
Sequence alignment	D	No applicable
Secondary structure analysis of amplicon	D	No applicable
Location of each primer by exon or intron (if applicable)	E	No applicable
What splice variants are targeted?	E	No applicable
qPCR OLIGONUCLEOTIDES
Primer sequences	E	page13-14 line280-281
RTPrimerDB Identification Number	D	No applicable
Probe sequences	D**	No applicable
Location and identity of any modifications	E	No modifications.
Manufacturer of oligonucleotides	D	page14 line288
Purification method	D	page13 line267-278
qPCR PROTOCOL
Complete reaction conditions	E	page13-14 line266-281
Reaction volume and amount of cDNA/DNA	E	page13-14 line266-281
Primer, (probe), Mg++ and dNTP concentrations	E	page13-14 line266-281
Polymerase identity and concentration	E	page13-14 line266-281
Buffer/kit identity and manufacturer	E	page13-14 line266-281
Exact chemical constitution of the buffer	D	page13-14 line266-281
Additives (SYBR Green I, DMSO, etc.)	E	page13-14 line266-281
Manufacturer of plates/tubes and catalog number	D	page13-14 line266-281
Complete thermocycling parameters	E	page13-14 line266-281
Reaction setup (manual/robotic)	D	page13-14 line266-281
Manufacturer of qPCR instrument	E	page13-14 line266-281
qPCR VALIDATION
Evidence of optimisation (from gradients)	D	No applicable
Specificity (gel, sequence, melt, or digest)	E	page13 line267-269
For SYBR Green I, Cq of the NTC	E	page13 line270-274
Standard curves with slope and y-intercept	E	No applicable
PCR efficiency calculated from slope	E	No applicable
Confidence interval for PCR efficiency or standard error	D	No applicable
r2 of standard curve	E	No applicable
Linear dynamic range	E	page13-14 line266-281
Cq variation at lower limit	E	page13-14 line266-281
Confidence intervals throughout range	D	page13-14 line266-281
Evidence for limit of detection	E	No applicable
If multiplex, efficiency and LOD of each assay.	E	No applicable
DATA ANALYSIS
qPCR analysis program (source, version)	E	page13 line277-278
Cq method determination	E	page13-14 line266-281
Outlier identification and disposition	E	page13-14 line266-281
Results of NTCs	E	page13-14 line266-281
Justification of number and choice of reference genes	E	page13-14 line266-281
Description of normalisation method	E	page13 line277-278
Number and concordance of biological replicates	D	page31 line669-674
Number and stage (RT or qPCR) of technical replicates	E	page31 line669-674
Repeatability (intra-assay variation)	E	page31 line669-674
Reproducibility (inter-assay variation, %CV)	D	page31 line669-674
Power analysis	D	page31 line669-674
Statistical methods for result significance	E	page31 line669-674
Software (source, version)	E	page13 line270-272
Cq or raw data submission using RDML	D	No applicable
Table 1. MIQE checklist for authors, reviewers and editors. All essential information (E) must be submitted with the manuscript. Desirable
information (D) should be submitted if available. If using primers obtained from RTPrimerDB, information on qPCR target, oligonucleotides,
protocols and validation is available from that source.
*: Assessing the absence of DNA using a no RT assay is essential when first extracting RNA. Once the sample has been validated as
RDNA-free, inclusion of a no-RT control is desirable, but no longer essential.
**: Disclosure of the probe sequence is highly desirable and strongly encouraged. However, since not all commercial pre-designed assay
vendors provide this information, it cannot be an essential requirement. Use of such assays is advised against.
