# Supplementary material for: Research and experimental verification on the mechanisms of cellular senescence in triple-negative breast cancer
Source: PeerJ. 2024 Feb 29;12:e16935. doi: 10.7717/peerj.16935 (PMC10909353; doi:10.7717/peerj.16935)
Supplement: Table S1 [file peerj-12-16935-s004.xlsx]

## Sheet: Sheet1
Table S1. Cell count of each sample before and after filtration
Samples	raw_count	clean_count	Percentage (%)
CID3946	692	691	99.86
CID44041	2130	2130	100
CID4465	1379	1379	100
CID4495	7939	7894	99.43
CID44971	7984	7909	99.06
CID44991	6994	6955	99.44
CID4513	5618	5472	97.4
CID4515	4143	3944	95.2
CID4523	1703	1633	95.89
