# Supplementary material for: Research and experimental verification on the mechanisms of cellular senescence in triple-negative breast cancer
Source: PeerJ. 2024 Feb 29;12:e16935. doi: 10.7717/peerj.16935 (PMC10909353; doi:10.7717/peerj.16935)
Supplement: Table S2 [file peerj-12-16935-s005.xlsx]

## Sheet: Sheet1
Table S2. The expressed markers of 11 cell subpopulations.
Subpopulations	Cell types	Markers
C0	epithelial cells	EPCAM
C1	CD8 T cells	CD8A, CD3D, GZMA, and CD8B
C2	macrophages	CD163 and CD68
C3	monocytes; fibroblasts	S100A8;
		ACTA2, FAP, PDGFRB, and NOTCH3
C4	plasma cells	CD79A and JSRP1
C5	B cells	CD19, CD79A, and MS4A1
C6	CD4 T cells	CD4 and CD3D
C7	endothelial cells	PECAM1
C8	fibroblasts	ACTA2, FAP, PDGFRB, and NOTCH3
C9	macrophages	CD163 and CD68
C10	monocytes	S100A8
